# Supplementary material for: Shape control in silver metal nanoparticle construction using dumb-bell dendrimers
Source: Royal Society of Chemistry journal article supplement (doi:10.1039/b810318f), 2008-01-01

**Supporting Information**

**Shape Control in Silver Metal Nanoparticle Construction Using Dumb-bell  
Dendrimers**

**Tatiana Vassilieff, Amy Sutton and Ashok Kakkar\***

*Department of Chemistry, McGill University, 801 Sherbrooke St. West,  
Montreal, Quebec H3A 2K6 Canada*

|                                                                                    |          |
|------------------------------------------------------------------------------------|----------|
| <b>General: Characterization Methods.....</b>                                      | <b>2</b> |
| <b>XRPD patterns for generations 1-3 templated silver particles.....</b>           | <b>3</b> |
| <b>Size distribution graphs for generation 1-3 templated silver particles.....</b> | <b>4</b> |

**General: Characterization Methods:**

Transmission electron microscopy (TEM) measurements were carried out on a JEOL 2000FX microscope operating at an acceleration voltage of 80 kV. X-ray powder diffraction (XRPD) experiments were performed using a Siemens D-5000 diffractometer. It was equipped with a step scanner and a 1.2 kW cobalt tube ( $\lambda = 1.78897 \text{ \AA}$ ) coupled to a silicon detector. The diffraction patterns were acquired in the reflection mode, for  $2\theta$  values ranging from 4 to 90 degrees. The X-ray beam was fixed while the sample holder and the detector were moved to scan the solids. UV-Vis measurements were recorded in water on a Hewlett Packard 8453 with a resolution of 2 nm.

**XRPD patterns for generations 1 (A), 2 (B) and 3 (C) templated silver particles**

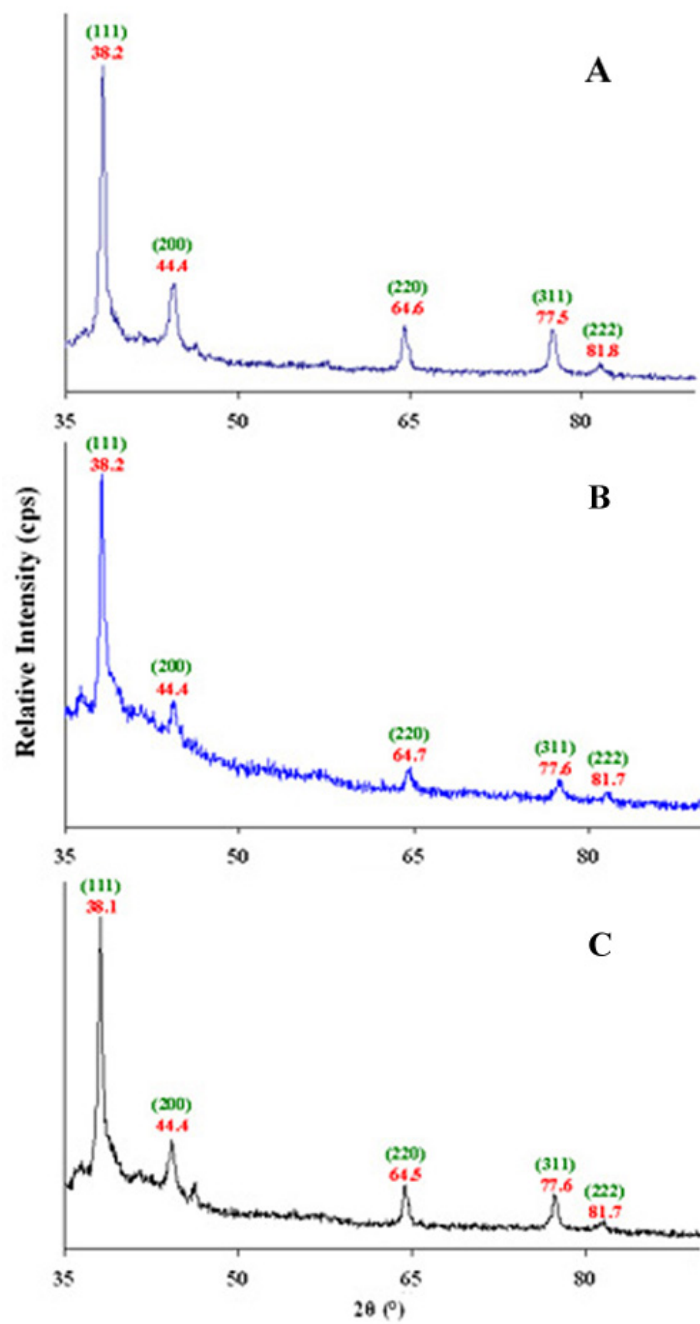

**Size distribution graphs for generation 1 (A), 2 (B) and 3 (C) templated silver particles**

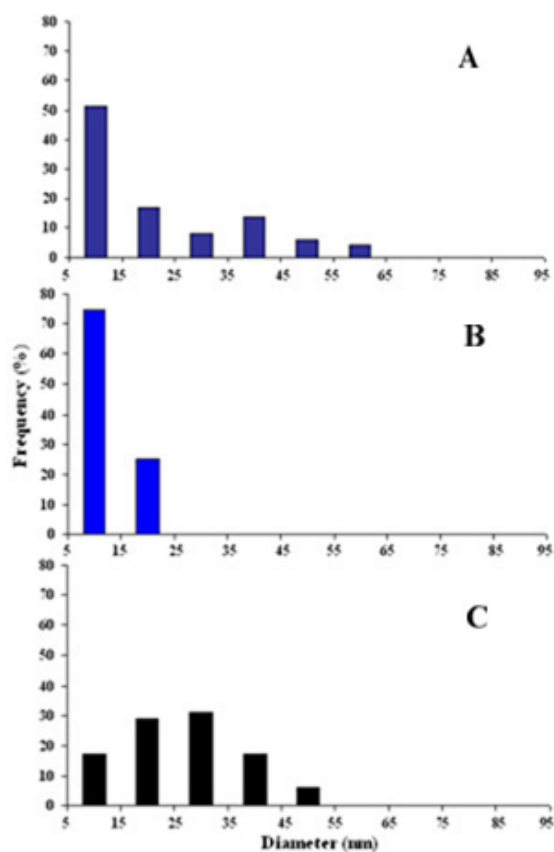

Supplement: b810318f.pdf [file b810318f.pdf]
